# Supplementary material for: Identification of a regulatory pathway governing TRAF1 via an arthritis-associated non-coding variant
Source: PubMed Central journal article supplement — Cell Genom. 2023 Oct 16;3(11):100420. doi: 10.1016/j.xgen.2023.100420 (PMC10667332; doi:10.1016/j.xgen.2023.100420), 2023-10-16
Supplement: mmc1.pdf [file mmc1.pdf]

**Supplemental information**

**Identification of a regulatory pathway  
governing TRAF1 via  
an arthritis-associated non-coding variant**

**Qiang Wang, Marta Martínez-Bonet, Taehyeung Kim, Jeffrey A. Sparks, Kazuyoshi Ishigaki, Xiaoting Chen, Marc Sudman, Vitor Aguiar, Sangwan Sim, Marcos Chiñas Hernandez, Darren J. Chiu, Alexandra Wactor, Brian Wauford, Miranda C. Marion, Maria Gutierrez-Arcelus, John Bowes, Stephen Eyre, Ellen Nordal, Sampath Prahalad, Marite Rygg, Vibeke Videm, Soumya Raychaudhuri, Matthew T. Weirauch, Carl D. Langefeld, Susan D. Thompson, and Peter A. Nigrovic**

# Supplementary figures for:

## Identification of a regulatory pathway governing TRAF1 via an arthritis-associated non-coding variant

Qiang Wang<sup>1,17</sup>, Marta Martínez-Bonet<sup>2,3,17</sup>, Taehyeung Kim<sup>1</sup>, Jeffrey A. Sparks<sup>2</sup>, Kazuyoshi Ishigaki<sup>2</sup>, Xiaoting Chen<sup>4</sup>, Marc Sudman<sup>4</sup>, Vitor Aguiar<sup>1</sup>, Sangwan Sim<sup>1</sup>, Marcos Chiñas Hernandez<sup>1</sup>, Darren J. Chiu<sup>2</sup>, Alexandra Wactor<sup>1</sup>, Brian Wauford<sup>1</sup>, Miranda C. Marion<sup>5</sup>, Maria Gutierrez-Arcelus<sup>1,4</sup>, John Bowes<sup>6,7</sup>, Stephen Eyre<sup>6,7</sup>, Ellen Nordal<sup>8</sup>, Sampath Prahalad<sup>9</sup>, Marite Rygg<sup>10,11</sup>, Vibeke Videm<sup>10</sup>, Soumya Raychaudhuri<sup>2,6,12,13,14</sup>, Matthew T. Weirauch<sup>4,15,16</sup>, Carl D. Langefeld<sup>5</sup>, Susan D. Thompson<sup>4,16</sup>, Peter A. Nigrovic<sup>1,2,18\*</sup>

1. Division of Immunology, Boston Children's Hospital, Harvard Medical School, Boston MA, USA
2. Division of Rheumatology, Inflammation, and Immunity, Brigham and Women's Hospital, Harvard Medical School, Boston MA, USA
3. Laboratory of Immune-regulation, Instituto de Investigación Sanitaria Gregorio Marañón, Madrid Spain
4. Center of Autoimmune Genomics and Etiology, Division of Human Genetics, Cincinnati Children's Hospital Medical Center, Cincinnati, Ohio, USA
5. Department of Biostatistics and Data Science, and Center for Precision Medicine, Wake Forest University School of Medicine, Winston-Salem, NC, USA
6. Centre for Genetics and Genomics Versus Arthritis, Centre for Musculoskeletal Research, Faculty of Biology, Medicine and Health, Manchester Academic Health Science Centre, The University of Manchester, Oxford Road, Manchester, UK.
7. NIHR Manchester Musculoskeletal Biomedical Research Unit, Manchester University NHS Foundation Trust, Manchester Academic Health Science Centre, UK.
8. University Hospital of North Norway and UIT The Arctic University of Norway, Tromsø, Norway
9. Emory University Department of Pediatrics and Children's Healthcare of Atlanta, Atlanta, GA, USA
10. Department of Clinical and Molecular Medicine, Faculty of Medicine and Health Sciences, Norwegian University of Science and Technology (NTNU), Trondheim, Norway
11. Department of Pediatrics, St. Olav's University Hospital, Trondheim, Norway
12. Broad Institute of MIT and Harvard, Cambridge, MA, 02142, USA
13. Center for Data Science, Brigham and Women's Hospital, Harvard Medical School, Boston, MA, USA
14. Department of Biomedical Informatics, Harvard Medical School, Boston, MA, USA
15. Divisions of Human Genetics, Biomedical Informatics, and Developmental Biology, Cincinnati Children's Hospital Medical Center, Cincinnati, OH, USA
16. Department of Pediatrics, University of Cincinnati College of Medicine, Cincinnati, Ohio, USA
17. These authors contributed equally
18. Lead contact

**Correspondence:** [peter.nigrovic@childrens.harvard.edu](mailto:peter.nigrovic@childrens.harvard.edu)

# S. Figure 1

A

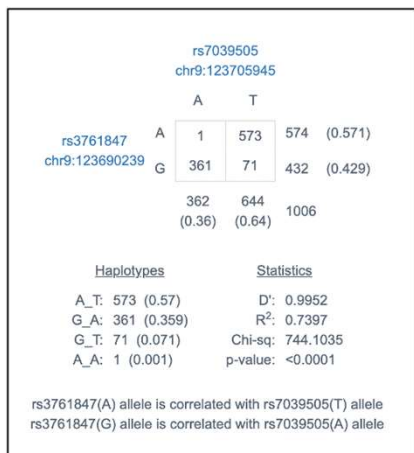

B

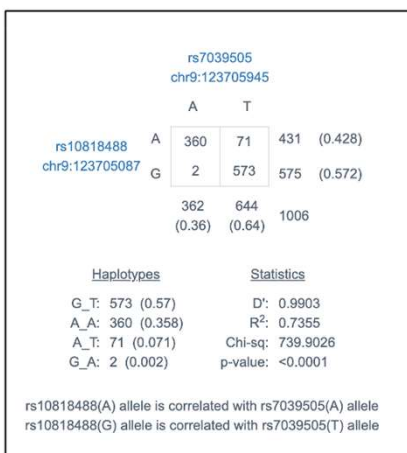

**Supplementary Figure 1. Linkage disequilibrium of rs7039505 with previously identified arthritis risk variants, related to Figure 1. (A) Rheumatoid arthritis, rs3761847. (B) Juvenile idiopathic arthritis, rs10818488.**

# S. Figure 2

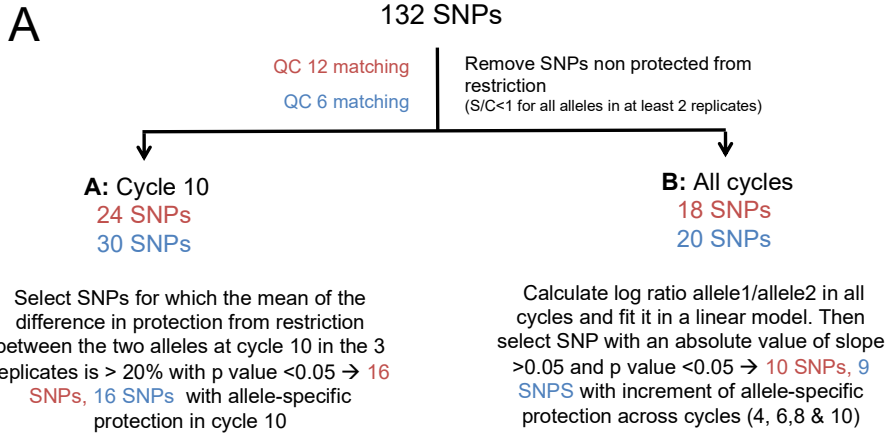

**B**

| QC 12 matching |            | QC 6 matching |            | Score |
|----------------|------------|---------------|------------|-------|
| Approach A     | Approach B | Approach A    | Approach B |       |
| rs7021880      | rs7021880  | rs7021880     | rs7021880  | 4     |
| rs7034653      | rs7034653  | rs7034653     | rs7034653  | 4     |
| rs758959       | rs758959   | rs758959      | rs758959   | 4     |
| rs6478484      | rs6478484  | rs6478484     | rs6478484  | 4     |
| rs7858209      |            | rs7858209     | rs7858209  | 3     |
| rs3761849      |            | rs3761849     | rs3761849  | 3     |
| rs7875829      | rs7875829  |               |            | 2     |
| rs9886724      | rs9886724  |               |            | 2     |
| rs10760129     | rs10760129 |               |            | 2     |
|                |            | rs10985073    | rs10985073 | 2     |
|                |            | rs1609810     | rs1609810  | 2     |
| rs1008381      |            | rs1008381     |            | 2     |
| rs10435844     |            | rs10435844    |            | 2     |
| rs7021206      |            | rs7021206     |            | 2     |
|                | rs10760130 |               | rs10760130 | 2     |
|                |            | rs10117059    |            | 1     |
|                |            | rs10739579    |            | 1     |
|                |            | rs1468671     |            | 1     |
|                |            | rs1860823     |            | 1     |
|                |            | rs4837804     |            | 1     |
| rs10985102     |            |               |            | 1     |
| rs7037195      |            |               |            | 1     |
| rs2109896      |            |               |            | 1     |
| rs4837799      |            |               |            | 1     |
|                | rs10739577 |               |            | 1     |
|                | rs10739581 |               |            | 1     |

**Supplementary Figure 2. Selection of SNPs for experimental investigation from SNP-seq, related to Figure 3. (A)** Schematic for analysis of SNP-seq NGS data. QC6 and QC12 matching refer to agreement of 6 or 12 nucleotides on each side of SNP from the NGS sequencing data with the original sequence. **(B)** Summary table of all the SNPs selected from SNP-seq based on one of the analysis approaches. The 11 SNPs highlighted in yellow were chosen for downstream validation. SNP, single nucleotide polymorphism; QC, quality control.

## S. Figure 3

### A rs7034653 cis-eQTLs with TRAF1 in monocyte

Monocyte

Raw P value:0.0098 Adj. P value: 0.9 Effect size: 0.4

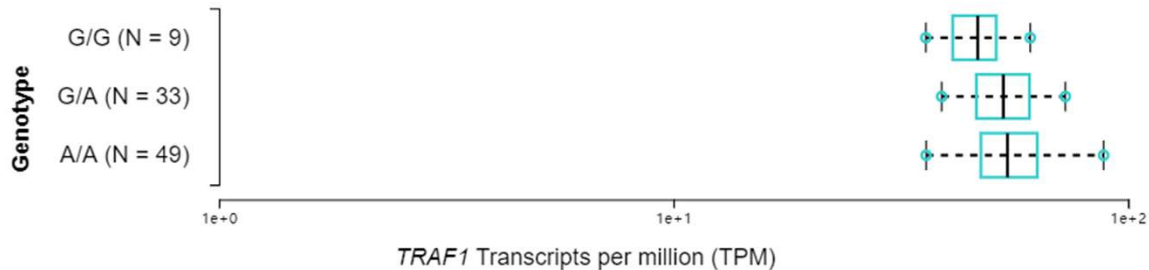

### rs1609810 cis-eQTLs with TRAF1 in monocyte

Monocyte

Raw P value:0.008 Adj. P value: 0.86 Effect size: 0.41

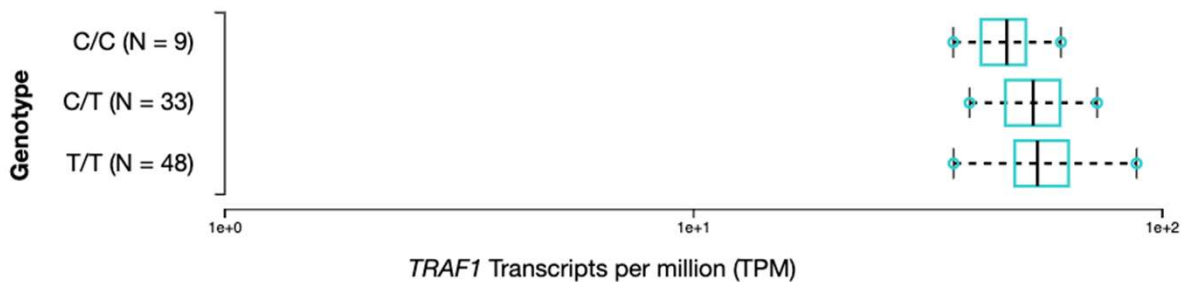

### B SNPs in cis-mQTLs with TRAF1 from BIOS QTL browser

| P-value   | SNP        | SNP Chr. | SNP Chr. Position | CpG        | CpG Chr. | CpG Chr. position | SNP Alleles | Assesed Allele | Z-score | Gene name | FDR  |
|-----------|------------|----------|-------------------|------------|----------|-------------------|-------------|----------------|---------|-----------|------|
| 6.15E-229 | rs7034653  | 9        | 123687372         | cg21152671 | 9        | 123690610         | A/G         | G              | 32.3    | TRAF1     | 0    |
| 5.55E-76  | rs1014530  | 9        | 123685092         | cg14064762 | 9        | 123688769         | C/T         | T              | 18.45   | TRAF1     | 0    |
| 6.03E-56  | rs1014530  | 9        | 123685092         | cg15551881 | 9        | 123688691         | C/T         | T              | 15.76   | TRAF1     | 0    |
| 1.66E-13  | rs77617771 | 9        | 123729896         | cg15551881 | 9        | 123688691         | G/A         | A              | 7.37    | TRAF1     | 0    |
| 2.49E-06  | rs10985143 | 9        | 123829010         | cg15551881 | 9        | 123688691         | C/G         | G              | 4.71    | TRAF1     | 0    |
| 3.14E-05  | rs10739574 | 9        | 123594836         | cg14064762 | 9        | 123688769         | G/A         | A              | 4.16    | TRAF1     | 0.02 |

**Supplementary Figure 3. Quantitative trait loci data, related to Figure 4. (A)** Expression quantitative trait loci data for rs7034653 and rs1609810 in human monocytes. **(B)** SNPs in cis-methylation quantitative trait loci with TRAF1 from BIOS QTL browser. QTL, quantitative trait loci.

# S. Figure 4

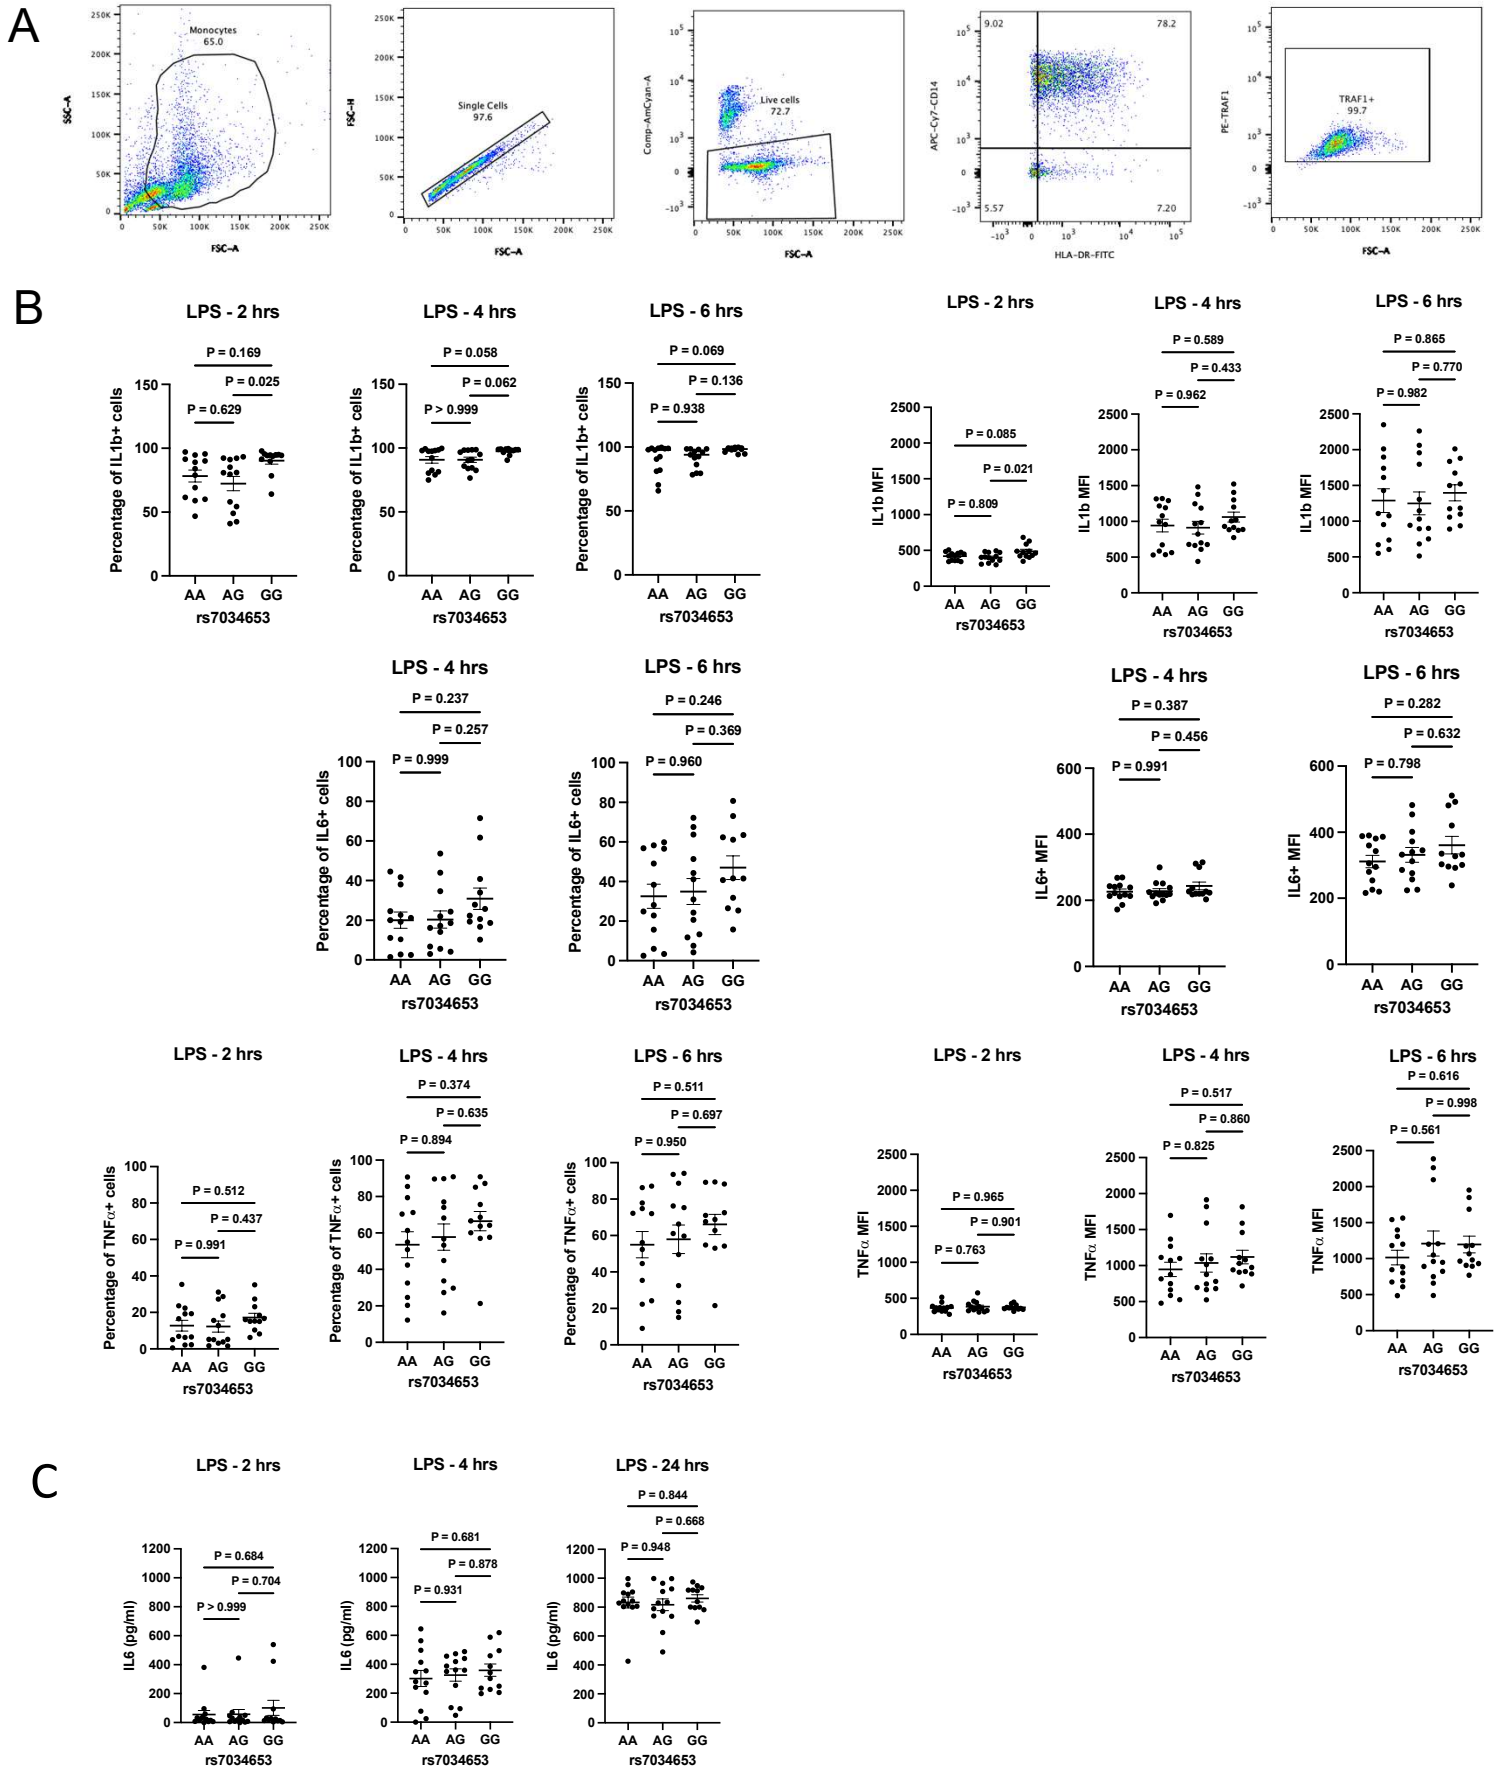

**Supplementary Figure 4. Cytokine production in human monocytes as a function of genotype at rs7034653, related to Figure 4. (A) Gating strategy for human monocytes. (B) Purified monocytes from healthy human PBMCs were treated with LPS (100 ng/ml for 2, 4 or 6 hrs), and percentage of cytokine producing cells as well as MFI was assessed by intracellular staining for IL-1, IL-6, and TNF. (C) IL-6 secreted by LPS-treated human monocytes measured by ELISA. Each symbol represents one donor; n = 13, 13, 12 human donors of genotypes AA, AG, GG, respectively. Statistical analysis was performed using one-way ANOVA multiple comparisons.**

## S. Figure 5

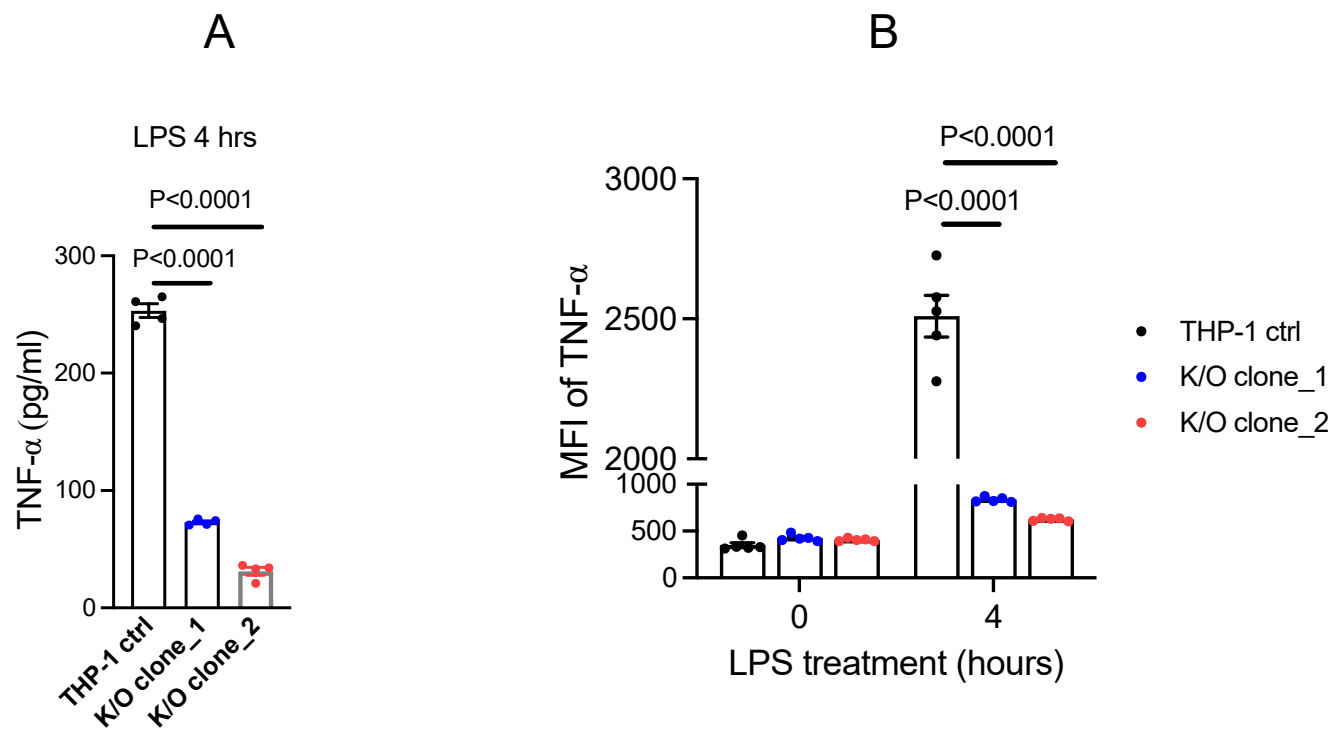

**Supplementary Figure 5. Cytokine production by THP-1 cells deficient in FRA2, related to Figure 5.** FRA2 knockout THP-1 clones show decreased TNF secretion (**A**) and intracellular production (**B**) compared with negative sgRNA-treated THP-1 control after 4 hours of LPS (100ng/ml) treatment (mean  $\pm$  SEM, n = 4 (A), and n=5 (B)). Statistical analysis methods used were one-way ANOVA with multiple comparisons.
